# Supplementary material for: Topology design of digital metamaterials for ultra-compact integrated photonic devices based on mode manipulation
Source: Royal Society of Chemistry journal article supplement (doi:10.1039/d1na00198a), 2021-01-01
Supplement: d1na00198a1.pdf [file d1na00198a1.pdf]

Electronic Supplementary Information for

**Topology Design of Digital Metamaterials for Ultra-Compact  
Integrated Photonic Devices Based on Mode Manipulation**

Han Ye<sup>1,\*</sup>, Yanrong Wang<sup>1</sup>, Shuhe Zhang<sup>1</sup>, Danshi Wang<sup>1</sup>, Yumin Liu<sup>1</sup>, Mingchao  
Wang<sup>2,\*</sup>, Qiming Zhang<sup>3,\*</sup>

<sup>1</sup> State Key Laboratory of Information Photonics and Optical Communications, Beijing  
University of Posts and Telecommunications, Beijing 100876, China

<sup>2</sup> Centre for Theoretical and Computational Molecular Science, Australian Institute for  
Bioengineering and Nanotechnology, The University of Queensland, St Lucia, QLD  
4072, Australia

<sup>3</sup> Centre for Artificial-Intelligence Nanophotonics, School of Optical-Electrical and  
Computer Engineering, University of Shanghai for Science and Technology, Shanghai  
200093, China.

\* Corresponding author: Han\_je@bupt.edu.cn (H. Ye);

mingchao.wang@uq.edu.au (M. Wang);

qimingzhang@usst.edu.cn (Q. Zhang).

**Table S1.** Air and silicon pixel amount in the designed digital metamaterials.

|                         | Air | Silicon |               | Air  | Silicon |
|-------------------------|-----|---------|---------------|------|---------|
| <b>2D designs</b>       |     |         |               |      |         |
| TE0-to-TE1              | 556 | 2027    | TE0-to-TE2    | 613  | 1970    |
| TE0-to-TE3              | 554 | 2029    | TE1-to-TE2    | 628  | 1955    |
| TE1-to-TE3              | 341 | 2242    | TE2-to-TE3    | 374  | 2209    |
| Diode                   | 760 | 1823    | Demultiplexer | 1046 | 2923    |
| <b>Quasi-3D designs</b> |     |         |               |      |         |
| TE0-to-TE1              | 803 | 1780    |               |      |         |
| Diode                   | 983 | 1600    | Demultiplexer | 834  | 3135    |

**Table S2.** Comparison between Ref. 1 and this work. Footprint and transmission efficiencies at center wavelength obtained from 2D simulations are listed for six mode conversions. It is noted that the distribution of refractive index (RI) in Ref. 1 had continuous regions, while in our design only air and silicon can be found.

|                  | Footprint                        | TE0-to-TE1 | TE0-to-TE2 | TE0-to-TE3 | TE1-to-TE2 | TE1-to-TE3 | TE2-to-TE3 |
|------------------|----------------------------------|------------|------------|------------|------------|------------|------------|
| <b>Ref. 1</b>    | $1.55\lambda^2$<br>Continuous RI | 99.3%      | 98.3%      | 90.6%      | 96.8%      | 86.3%      | 80.1%      |
| <b>This work</b> | $0.645\lambda^2$<br>Binary RI    | 98.4%      | 96.7%      | 88.2%      | 95.3%      | 88.7%      | 85.3%      |

**Table S3.** Comparison between reported TE<sub>0</sub>-to-TE<sub>1</sub> mode converter and this work. Transmission efficiencies at center wavelength obtained from 3D simulations are listed.

|                  | Scheme               | Footprint                  | TE <sub>0</sub> -to-TE <sub>1</sub> (3D) |
|------------------|----------------------|----------------------------|------------------------------------------|
| <b>Ref. 2</b>    | Photonic crystal     | ~6.3μm×3.2μm               | 3D Opt: ~80%<br>Quasi-3D Opt: ~60%       |
| <b>Ref. 3</b>    | Taper waveguide      | ~18.6μm×2.8μm              | 98.6%                                    |
| <b>Ref. 4</b>    | Ge/Si pattern        | 1.0μm×1.55μm               | ~91%                                     |
| <b>Ref. 5</b>    | Digital metamaterial | 1.1μm×2.3μm<br>1.0μm×3.1μm | 57%<br>37%                               |
| <b>This work</b> | Digital metamaterial | 1.0μm×1.55μm               | 52.7%                                    |

**Table S4.** Comparison between reported reciprocal optical diodes and this work. Footprint, transmission efficiencies at center wavelength and contrast ratio ( $T_{forw}/T_{back}$ ) obtained from 3D simulations are listed.

|                  | Scheme               | Footprint                  | Forward (3D)           | Backward (3D) | Contrast ratio |
|------------------|----------------------|----------------------------|------------------------|---------------|----------------|
| <b>Ref. 6</b>    | Ag splitter          | 4.0μm×0.65μm               | 62%                    | 0.3%          | 206            |
| <b>Ref. 7</b>    | Partially etching    | 7.0μm×1.0μm                | 62%                    | 0.53%         | 117            |
| <b>Ref. 8</b>    | Digital metamaterial | 3.0μm×3.0μm                | TE: 71.1%<br>TM: 91.1% | 1.8%<br>3.2%  | 40<br>28.5     |
| <b>Ref. 5</b>    | Digital metamaterial | 1.1μm×2.3μm<br>1.0μm×3.1μm | 57%<br>37%             | 1.8%<br>0.9%  | 32<br>41       |
| <b>This work</b> | Digital metamaterial | 1.0μm×1.55μm               | 43.1%                  | 0.47%         | 91.7           |

**Table S5.** Comparison between inversely designed mode-order demultiplexers and this work. Channel number, footprint, insertion loss at center wavelength and contrast ratio obtained from 3D simulations are listed.

|                  | Channel number | Footprint                                      | Insertion loss (3D) | Contrast ratio |
|------------------|----------------|------------------------------------------------|---------------------|----------------|
| <b>Ref. 9</b>    | 2              | 4.22 $\mu\text{m}$ $\times$ 2.6 $\mu\text{m}$  | -0.25dB             | ~17dB          |
|                  | 3              | 6.08 $\mu\text{m}$ $\times$ 4.93 $\mu\text{m}$ |                     |                |
| <b>Ref. 10</b>   | 4              | 5.4 $\mu\text{m}$ $\times$ 6.0 $\mu\text{m}$   | < -1.5dB            | 18 dB          |
| <b>Ref. 11</b>   | 3              | 3.6 $\mu\text{m}$ *4.8 $\mu\text{m}$           | < -1.5dB            | 22dB           |
| <b>This work</b> | 2              | 1.55 $\mu\text{m}$ $\times$ 1.55 $\mu\text{m}$ | -2.2dB              | 14.7dB         |

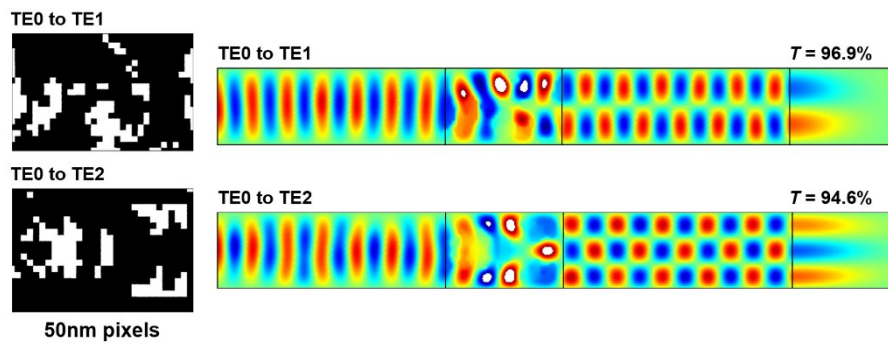

**Figure S1.** Designs for mode converters (TE0-to-TE1 and TE0-to-TE2) with 50nm pixels and corresponding magnetic fields simulated at center wavelength.

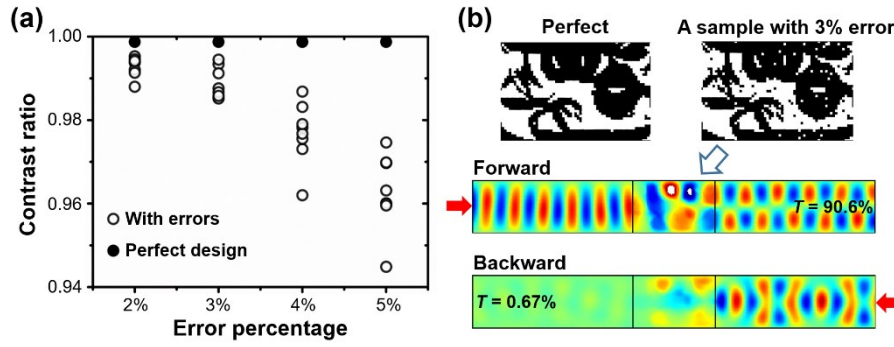

**Figure S2.** Contrast ratio of reciprocal optical diode with random errors. (b) Structure and magnetic field of a diode sample with 3% error. This sample is the one with the lowest contrast ratio among 8 samples with 3% error percentage.

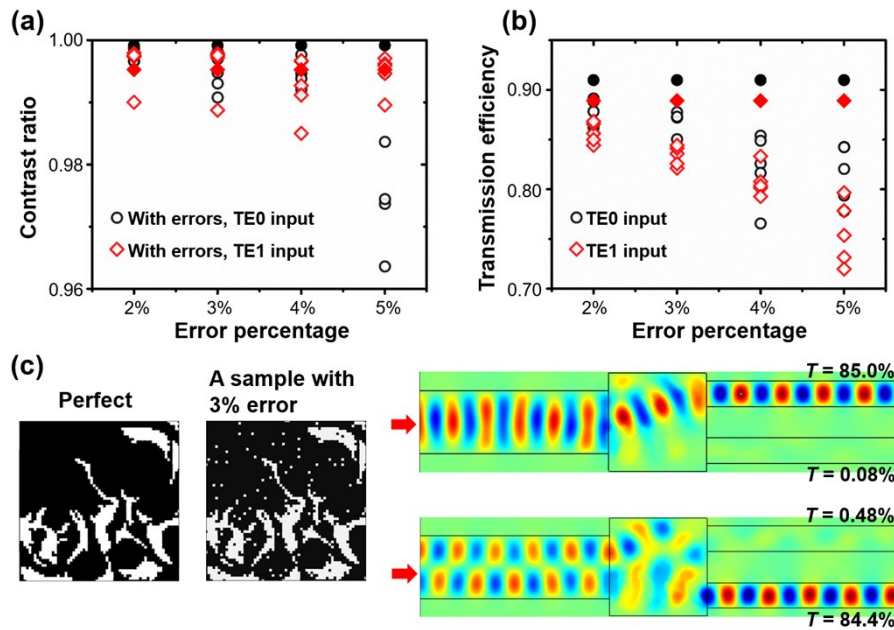

**Figure S3.** Contrast ratio and transmission efficiencies of demultiplexer with random errors. (b) Structure and magnetic field of a diode sample with 3% error. This sample is the one with the lowest contrast ratio among 5 samples with 3% error percentage.

## References

1. J. Lu, J. Vuckovic, Objective-first design of high-efficiency, small-footprint couplers between arbitrary nanophotonic waveguide modes, *Opt. Express* 20 (2012) 7221.
2. L.H. Frandsen, Y. Elesin, L.F. Frellsen, M. Mitrovic, Y. Ding, O. Sigmund, K. Yvind, Topology optimized mode conversion in a photonic crystal waveguide fabricated in silicon-on insulator material, *Opt. Express* 22 (2014) 8525.
3. D. Chen, X. Xiao, L. Wang, Y. Yu, W. Liu, Q. Yang, Low-loss and fabrication tolerant silicon mode order converters based on novel compact tapers, *Opt. Express* 23 (2015) 11152.
4. H. Ye, F. Yu, Y. Liu, Z. Yu, J. Li, D.F. Zhu, B.D. Su, W.B. Xu, Ultra-Compact Waveguide-Integrated TE-Mode Converters With High Mode Purity by Designing Ge/Si Patterns, *IEEE Photon. J.* 11 (2019) 6602208
5. F. Callewaert, S. Butun, Z. Li, K. Aydin, Inverse design of an ultra-compact broadband optical diode based on asymmetric spatial mode conversion, *Sci. Rep.* 6 (2016) 32577.
6. J. Li, H. Ye, Z. Yu, Y. Liu, Design of a broadband reciprocal optical diode in a silicon waveguide assisted by silver surface plasmonic splitter, *Opt. Express* 25 (2017) 19129.
7. D. Zhu, J. Zhang, H. Ye, Z. Yu, Y. Liu, Design of a broadband reciprocal optical diode in multimode silicon waveguide by partial depth etching, *Opt. Commun.* 418 (2018) 88.
8. B. Shen, R. Polson, R. Menon, Integrated digital metamaterials enables ultra-compact optical diodes, *Opt. Express* 23 (2015) 10847.
9. L.F. Frellsen, Y. Ding, O. Sigmund, L.H. Frandsen, Topology optimized mode multiplexing in silicon-on-insulator photonic wire waveguides, *Opt. Express* 24 (2016) 16866.
10. H. Xie, Y. Liu, S. Wang, Y. Wang, Y. Yao, Q. Song, J. Du, Z. He, K. Xu, Highly Compact and Efficient Four-Mode Multiplexer Based on Pixelated Waveguides, *IEEE Photon. Technol. Lett.* 32 (2020) 166.
11. W. Chang, L. Lu, X. Ren, L. Lu, M. Cheng, D. Liu, .M.M. Zhang, An Ultracompact Multimode Waveguide Crossing Based on Subwavelength Asymmetric Y-Junction, *IEEE Photon. J.* 10 (2018) 4501008.
